# Mechanisms of Water Transport Mediated by PIP Aquaporins and Their Regulation Via Phosphorylation Events Under Salinity Stress in Barley Roots

Tomoaki Horie<sup>1,3</sup>, Toshiyuki Kaneko<sup>1</sup>, Genki Sugimoto<sup>1</sup>, Shizuka Sasano<sup>1</sup>, Sanjib Kumar Panda<sup>2</sup>, Mineo Shibasaki<sup>1</sup> and Maki Katsuhara<sup>1,\*</sup>

<sup>1</sup>Group of Molecular and Functional Plant Biology, Institute of Plant Science and Resources, Okayama University, 20-1, Chuo-2-chome, Kurashiki, Okayama, 710-0046 Japan

<sup>2</sup>Plant Molecular Biology Laboratory, Department of Life Science, Assam Central University, Silchar-788011, India

<sup>3</sup>Present address: Division of Applied Biology, Faculty of Textile Science and Technology, Shinshu University, 3-15-1, Tokita, Ueda, Nagano, 386-8567 Japan

\*Corresponding author: E-mail, kmaki@rib.okayama-u.ac.jp; Fax, +81-86-434-1249  
(Received June 19, 2010; Accepted March 1, 2011)

Water homeostasis is crucial to the growth and survival of plants under water-related stress. Plasma membrane intrinsic proteins (PIPs) have been shown to be primary channels mediating water uptake in plant cells. Here we report the water transport activity and mechanisms for the regulation of barley (*Hordeum vulgare*) PIP aquaporins. HvPIP2 but not HvPIP1 channels were found to show robust water transport activity when expressed alone in *Xenopus laevis* oocytes. However, the co-expression of HvPIP1 with HvPIP2 in oocytes resulted in significant increases in activity compared with the expression of HvPIP2 alone, suggesting the participation of HvPIP1 in water transport together with HvPIP2 presumably through heteromerization. Severe salinity stress (200 mM NaCl) significantly reduced root hydraulic conductivity ( $L_p$ ) and the accumulation of six of 10 HvPIP mRNAs. However, under relatively mild stress (100 mM NaCl), only a moderate reduction in  $L_p$  with no significant difference in HvPIP mRNA levels was observed. Sorbitol-mediated osmotic stress equivalent to 100 and 200 mM NaCl induced nearly identical  $L_p$  reductions in barley roots. Furthermore, the water transport activity in intact barley roots was suggested to require phosphorylation that is sensitive to a kinase inhibitor, staurosporine. HvPIP2s also showed water efflux activity in *Xenopus* oocytes, suggesting a potential ability to mediate water loss from cells under hypertonic conditions. Water transport via HvPIP aquaporins and the significance of reductions of  $L_p$  in barley plants during salinity stress are discussed.

**Keywords:** Aquaporin • Barley • Plasma membrane intrinsic proteins (PIPs) • Root hydraulic conductivity • Salinity stress • Water transport.

**Abbreviations:** DMSO, dimethylsulfoxide;  $L_p$ , root hydraulic conductivity; MBS, modified Barth's solution; MIP, major

intrinsic protein; OA, okadaic acid; PBS, phosphate-buffered saline;  $P_f$ , osmotic water permeability coefficient; PIP, plasma membrane intrinsic protein; St, staurosporine.

## Introduction

The acquisition and distribution of water are pivotal to the growth and development of plants. Water transport across cellular membranes relies largely on water channel activity mediated by aquaporins (Maurel et al. 2008). Aquaporins are pore-forming integral membrane proteins that belong to the major intrinsic protein (MIP) family (Forrest and Bhawe 2007). More than 30 MIPs have been found in *Arabidopsis thaliana*, rice (*Oryza sativa*) and maize (*Zea mays*) (Chaumont et al. 2005, Sakurai et al. 2005). Plant MIPs are classified into five subfamilies, the plasma membrane intrinsic proteins (PIPs), tonoplast intrinsic proteins (TIPs), nodulin 26-like intrinsic proteins (NIPs), small intrinsic proteins (SIPs) and X intrinsic proteins (XIPs). The XIPs were identified recently in some plant species including moss (Danielson and Johanson 2008) and tomato (Sade et al. 2009). Several plant MIPs have been suggested or demonstrated to mediate the transport of small non-charged molecules in addition to water (Dordas et al. 2000, Tyerman et al. 2002, Gaspar et al. 2003, Uehlein et al. 2003, Hanba et al. 2004, Ma et al. 2006, Takano et al. 2006, Bienert et al. 2007, Dynowski et al. 2008, Ma et al. 2008). Plant PIPs can be further classified into two subgroups, PIP1 and PIP2, and have been reported to show substantial water transport activity when expressed in *Xenopus laevis* oocytes or yeast, particularly in the case of PIP2 channels (Chaumont et al. 2000). Together with the functional characterization of PIPs based on analyses of heterologous expression, results of physiological experiments showing that water uptake by roots is inhibited by mercury

*Plant Cell Physiol.* 52(4): 663–675 (2011) doi:10.1093/pcp/pcr027, available online at [www.pcp.oxfordjournals.org](http://www.pcp.oxfordjournals.org)

© The Author 2011. Published by Oxford University Press on behalf of Japanese Society of Plant Physiologists.

All rights reserved. For permissions, please email: [journals.permissions@oup.com](mailto:journals.permissions@oup.com)

ions, shown to block the transport activity of many aquaporins, and changes in root hydraulic conductivity ( $L_p$ ) in transgenic plants overexpressing *PIP* genes have led to the notion that aquaporins, especially PIPs, are the main pathway by which water is taken up from the soil into roots (Javot and Maurel 2002, Katsuhara et al. 2008).

Soil salinity is a major abiotic stress reducing the productivity of glycophytes including most agricultural products. Impairments of plant growth and productivity due to high concentrations of salts such as NaCl are caused by two primary factors, osmotic stress and ion toxicity (Munns and Tester 2008, Horie et al. 2009, Hauser and Horie 2010). Osmotic stress is the first stress that plants encounter in saline soil and has an immediate influence on the growth of plants under salinity stress, while ion toxicity occurs later when salt levels reach some threshold beyond which the plant cannot maintain ion homeostasis and growth (Munns and Tester 2008, Horie et al. 2009, Hauser and Horie 2010). High concentrations of salts in soil increase osmotic pressure and reduce water potential, which eventually cause a reduction in water uptake or loss of water. Furthermore, it has been reported that salinity stress induces a reduction in the  $L_p$  in many plant species (Azaizeh and Steudle 1991, Peyrano et al. 1997, Carvajal et al. 1999, Martinez-Ballesta et al. 2000, Martinez-Ballesta et al. 2003, Boursiac et al. 2005). Therefore, salinity stress rapidly affects water uptake in roots, and regulation of the activity of water channels in response to salinity stress is important to the viability of plants under salinity stress.

In barley (*Hordeum vulgare*), several *PIP* genes have been identified (Hollenbach and Dietz 1995, Katsuhara et al. 2002, Wei et al. 2007). The water channel activity of HvPIP1;3, HvPIP1;6 and HvPIP2;1 aquaporins has been characterized using *X. laevis* oocytes (Katsuhara et al. 2002, Katsuhara and Shibasaki 2007, Wei et al. 2007). Preliminary analyses of an expressed sequence tag (EST) database revealed that many other aquaporin genes including *PIP1* and *PIP2* exist in barley, forming a large gene family as found in other plant species (Katsuhara and Hanba 2008), raising the necessity to characterize new HvPIPs in order to understand the water transport mechanism mediated by HvPIP aquaporins in barley plants.

In this study, we present the mechanism of water transport mediated by HvPIP channels. Newly identified HvPIP1 proteins expressed in *Xenopus* oocytes showed little water transport activity, while HvPIP2 proteins showed robust activity. We show that hypertonic conditions including salinity stress trigger reductions of  $L_p$  in barley plants. Furthermore, we suggest that the water transport activity in intact roots requires phosphorylation by a staurosporine (St)-sensitive kinase. We also present evidence that HvPIP2 channels expressed in *Xenopus* oocytes mediate water efflux under hypertonic conditions, implying that the channels regulate water loss from cells under saline conditions, which could be a major target for down-regulation to reduce  $L_p$  in barley roots in response to salinity stress.

## Results

### Isolation of HvPIP cDNAs from barley roots

Several HvPIP cDNAs, named *HvEmip*, *HvPIP2;1*, *HvPIP1;3*, *HvPIP1;5* and *HvPIP1;6*, have been isolated previously (Hollenbach and Dietz 1995, Katsuhara et al. 2002, Wei et al. 2007). Aquaporin genes are known to form a multigene family in different plant species (Chaumont et al. 2005, Sakurai et al. 2005). We therefore searched for barley aquaporin genes in the database of HarvEST using the DNA sequence of the *HvPIP2;1* cDNA, which led to the identification of seven additional HvPIP-like sequence contigs (Katsuhara and Hanba 2008). Based on these sequences, putative full-length cDNAs were isolated from a cultivar of barley, Haruna-nijyo. The deduced amino acid sequences of the newly identified HvPIP cDNAs were found to retain six transmembrane domain regions and two NPA motifs highly conserved among aquaporins (data not shown) (Maurel et al. 2008). A phylogenetic analysis of amino acid sequences of the 10 HvPIP proteins in parallel with 11 amino acid sequences from rice (*O. sativa*) PIP proteins indicated that three of the seven newly isolated HvPIP proteins were PIP1 isoforms, while four were PIP2 isoforms (Fig. 1).

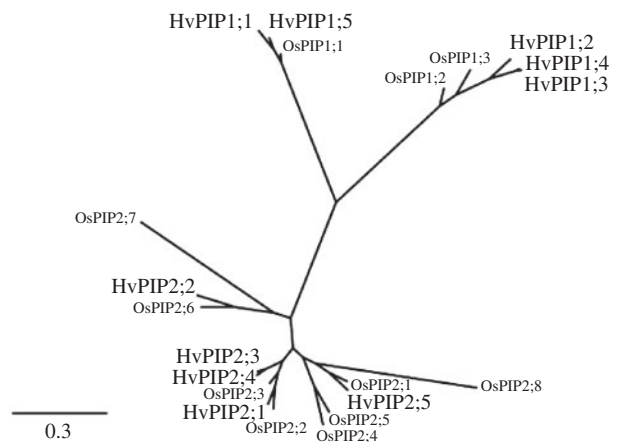

**Fig. 1** A phylogenetic analysis of amino acid sequences of the plasma membrane intrinsic proteins (PIPs) from barley (*H. vulgare* cv. Haruna-nijyo) and rice (*O. sativa* cv. Nipponbare). HvPIP sequences were found to fall into two primary subfamilies as has been shown for PIP sequences from several plant species. All the HvPIP proteins identified were located on similar branches. Accession numbers for each sequence are: HvPIP1;1 (AB286964), HvPIP1;2 (AB275278), HvPIP1;3 (AB009308), HvPIP1;4 (AB275279), HvPIP1;5 (AB009309); HvPIP2;1 (AB009307), HvPIP2;2 (AB377269), HvPIP2;3 (AB275280), HvPIP2;4 (AB219525) and HvPIP2;5 (AB377270), respectively. Accession numbers for rice PIP sequences were from Sakurai et al. (2003). The tree was constructed at Phylogeny.fr ([http://www.phylogeny.fr/version2\\_cgi/index.cgi](http://www.phylogeny.fr/version2_cgi/index.cgi)) (Dereeper et al. 2008). The scale bar indicates 0.3 substitutions per site.

## Growth responses of barley plants and the accumulation of HvPIP mRNA in roots upon salinity stress

We profiled the response of the cultivar Haruna-nijyo to salinity stress imposed by 100, 200, 300 and 400 mM NaCl for 24 h. No remarkable impact on the growth of shoots or roots was observed at 100 mM, but severe growth inhibition was found at >200 mM NaCl (Fig. 2).

We next investigated the effects of high concentrations of NaCl on the accumulation of HvPIP mRNA in roots of barley, focusing particularly on the 100 and 200 mM NaCl treatments. Quantitative PCR analyses using roots of barley seedlings, with or without NaCl treatment, revealed that: (i) HvPIP1;2, HvPIP1;3 and HvPIP2;2 mRNA are the three most accumulated HvPIP mRNAs (Fig. 3A); (ii) 100 mM NaCl did not cause any significant difference in the accumulation of the 10 HvPIP mRNAs compared with the control (Fig. 3A, B); and (iii) the accumulation of HvPIP1;2, HvPIP1;3, HvPIP1;4, HvPIP2;1, HvPIP2;2 and HvPIP2;3 mRNAs was significantly reduced in response to 200 mM NaCl in the last 4 h of the treatment period (Fig. 3A, C). These results indicated that the accumulation of six out of 10 HvPIP mRNAs decreased under severe salinity stress where barley plants no longer cope with the stress to maintain growth.

## Water transport mediated by HvPIP proteins

We performed water swelling assays using *Xenopus* oocytes to determine the water transport activity of each HvPIP channel. A 50 ng aliquot of HvPIP cRNA was injected into *Xenopus* oocytes and time-dependent increases in the volume of the oocytes were monitored in a half-strength modified Barth's solution (MBS). Changes in the relative volume of oocytes

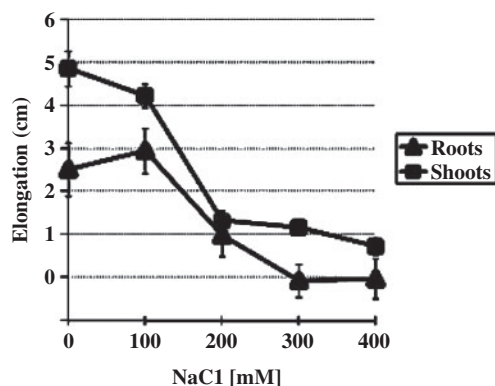

**Fig. 2** Growth of the shoots and roots of barley (*H. vulgare* cv. Haruna-nijyo) exposed to high NaCl concentrations. NaCl at >200 mM but not 100 mM significantly inhibited the elongation of shoots and roots. Four-day-old seedlings were transferred to a hydroponic growth medium containing either 0, 100, 200, 300 or 400 mM NaCl and further grown for 24 h. The elongation of shoots and roots during this 24 h of stress was measured by subtracting the length of shoot and root samples at time 0 from those after 24 h. Error bars represent the standard deviations ( $n = 8-10$ ).

during the 3 min monitoring period are plotted in Fig. 4. All five HvPIP2 isoforms showed robust water transport activity in oocytes compared with the water-injected control (Fig. 4). In contrast, HvPIP1-expressing oocytes showed little increase in relative volume, with the exception of HvPIP1;3-expressing oocytes injected with 50 ng of HvPIP1 cRNA (Fig. 4).

A plant aquaporin from spinach has been demonstrated to form a tetramer (Törnroth-Horsefield et al. 2006). PIP1 isoforms from several plant species were reported to show little water transport activity themselves. Co-expression of *Z. mays* (*Zm*) PIP2 isoforms with several PIP1 isoforms has been shown to enhance net water transport activity through heteromerization of the two isoforms compared with the activity mediated by *Zm*PIP2 alone in *Xenopus* oocytes (Fetter et al. 2004). We therefore performed further water swelling assays to examine the role of HvPIP1 isoforms in water transport by co-expressing HvPIP1 and HvPIP2 in oocytes. We focused on HvPIP1;2, HvPIP1;3 and HvPIP1;4 channels as: (i) HvPIP1;2 and HvPIP1;3 mRNAs are the two most highly expressed of the 10 HvPIP mRNAs in roots of barley (Fig. 3A); and (ii) the accumulation of these three mRNAs was found to be decreased in response to 200 mM NaCl (Fig. 3A, C). When 10 ng of cRNA from each HvPIP1 was injected into oocytes, no significant water transport activity was found compared with that in water-injected control oocytes (Fig. 5; see Supplementary Fig. S1 for HvPIP1;4). When each HvPIP2 was co-expressed with either HvPIP1;2 or HvPIP1;4, there was a significant increase in the osmotic water permeability coefficient ( $P_f$ ) compared with when each HvPIP2 was expressed alone (Fig. 5A; see Supplementary Fig. S1 for HvPIP1;4). Interestingly, however, co-expression of each HvPIP2 with HvPIP1;3 did not cause any significant enhancement of the water transport activity (Fig. 5B). Note that oocytes injected with <2 ng of cRNA show an increase in the  $P_f$  proportional to the amount of cRNA injected, indicating that the protein level of PIPs is properly regulated/controlled in such experiments (Supplementary Fig. S2). These results strongly suggested that HvPIP1;2 and HvPIP1;4, but not HvPIP1;3, mediate water transport in combination with HvPIP2 channels in barley roots.

Indirect immunofluorescence microscopy was performed using two kinds of peptide antibodies that recognize either all HvPIP1 proteins or HvPIP2;2 specifically in order to determine the tissue-specific expression of these proteins in roots of barley. Immunolabeling of HvPIP1 and HvPIP2;2 was detected through hybridization of red fluorescent Alexa 647-conjugated anti-rat IgG goat antibody and green fluorescent Alexa 488-conjugated anti-rabbit IgG goat antibody, respectively, using appropriate filter sets. Strong red fluorescence derived from HvPIP1 proteins was found in the vicinity of the xylem and a more moderate expression was also detected in the cortex layer (Fig. 6A, B). Strong HvPIP2;2-derived green fluorescence was found in the epidermis, especially in cells developing a root hair (Fig. 6A, C). The fluorescence signal was also detected in the stele (Fig. 6A, C). Some background green fluorescence was detected on the xylem vessels, but not on

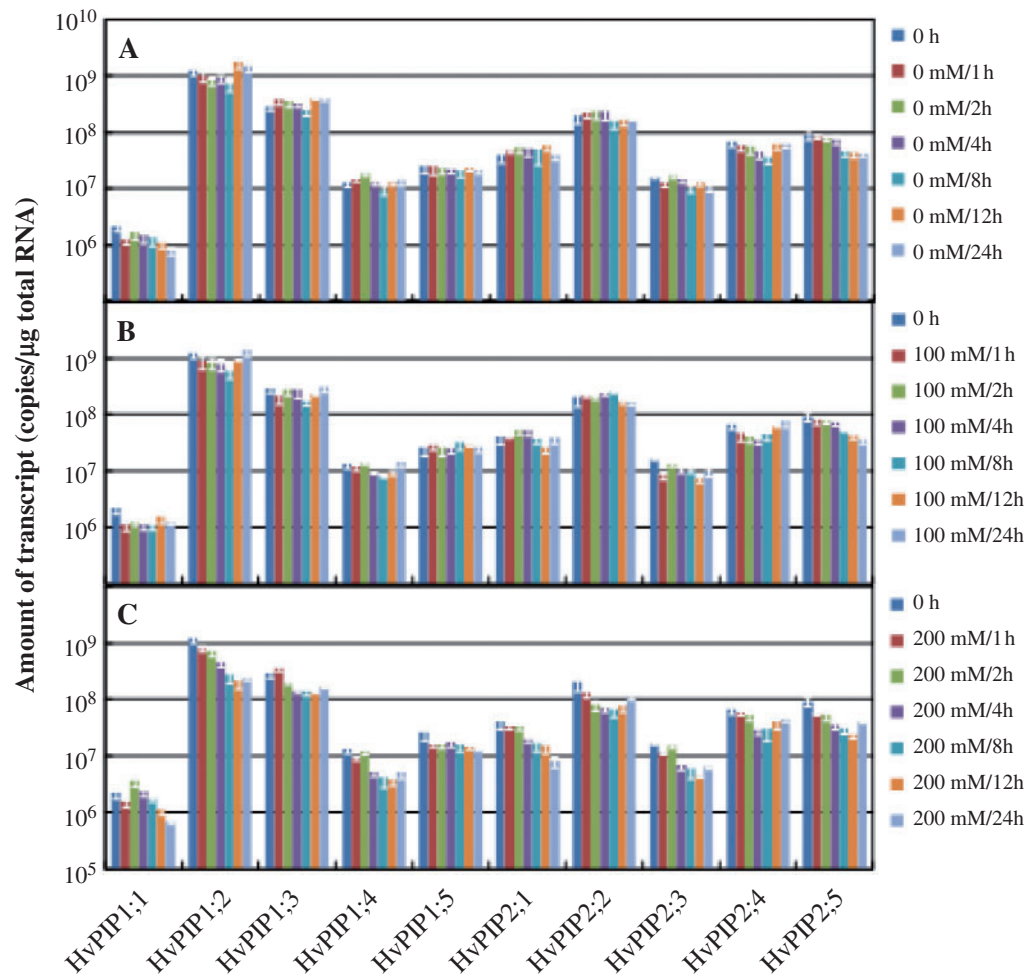

**Fig. 3** Severe NaCl stress, but not relatively mild NaCl stress, decreased the accumulation of six out of 10 *HvPIP* mRNAs in barley roots. Four-day-old barley seedlings were transferred to a hydroponic growth medium containing either 0, 100 or 200 mM NaCl for 0, 1, 2, 4, 8, 12 and 24 h, and total RNA was extracted from roots. The level of each *HvPIP* mRNA was quantified by Q-PCR. Transcript levels were represented as copy numbers per  $\mu\text{g}$  of total RNA. Data are presented as mean values from at least three independent experiments and the error bars represent standard deviations. (A) Control (0 mM NaCl); (B) 100 mM NaCl; (C) 200 mM NaCl.

other stellar cells, as shown in **Fig. 6F**. However, the specific signals in the root stellar cells from anti-*HvPIP1* and anti-*HvPIP2;2* antibodies were stronger than the background levels (**Supplementary Fig. S3**). When the two images were merged, strong yellow fluorescence was revealed in the root stele (**Fig. 6A, D**), indicating that *HvPIP2;2* and some or all *HvPIP1* proteins were expressed in the same type of cell in the stele of barley roots.

### Regulation of $L_p_r$ in intact barley roots

To characterize the  $L_p_r$  of barley roots in response to salinity stress, we employed the pressure chamber method (Tournaire-Roux et al. 2003, Boursiac et al. 2005). Xylem sap samples were collected from barley plants exposed to either 0, 100 or 200 mM NaCl for 4 h. The average pressure–flow relationships exhibited reductions of sap flow due to salinity

stress in comparison with the control (**Fig. 7A**). Comparisons of  $L_p_r$  also indicated that 100 mM NaCl caused moderate reductions ( $P > 0.05$ ; statistically insignificant), while 200 mM NaCl induced more significant reductions ( $P < 0.001$ ; **Fig. 7B**). The deleterious effects of salinity stress are caused by two independent factors, osmotic stress and ion toxicity (Munns and Tester 2008, Horie et al. 2009, Hauser and Horie 2010). To investigate whether the salinity-induced reductions in  $L_p_r$  are relevant to the osmotic stress phase, osmotic conditions equivalent to 100 and 200 mM NaCl were established using sorbitol. Barley plants were exposed to 177 and 354 mM sorbitol solutions for 4 h and  $L_p_r$  was measured using a pressure chamber. Both sorbitol solutions evoked nearly identical reductions in  $L_p_r$  to the corresponding NaCl treatments (**Fig. 7B**). These results indicated that the water transport in barley roots is down-regulated in response to salinity stress, particularly to the osmotic stress phase.

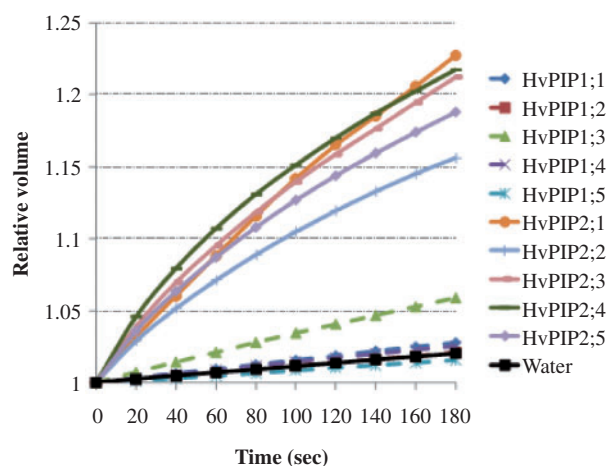

**Fig. 4** The water transport activity of HvPIPs when expressed alone in *Xenopus* oocytes. HvPIP2 isoforms show robust water transport activity, while HvPIP1 isoforms show weak activity. Oocytes injected with either water or 50 ng of each *HvPIP* cRNA were incubated in an MBS for approximately 24 h at 18°C. Changes in the volume of each oocyte were monitored for 3 min after transfer of the oocyte to a hypotonic solution (half-strength MBS). Results are shown as mean values relative to the original volume at time 0 ( $n = 7-9$ ).

We further measured  $L_p$  to investigate whether phosphorylation events participated in the regulation, focusing on the 100 mM NaCl treatment where no significant difference in the accumulation of *HvPIP* mRNA was found (Fig. 3A). Barley plants were treated with a kinase inhibitor, either K252a or St, or the phosphatase inhibitor okadaic acid (OA) for 4 h in the presence of 100 mM NaCl prior to the  $L_p$  measurements. Interestingly, St-treated plants, but neither K252a- nor OA-treated plants, showed significant reductions in  $L_p$  in the presence of 100 mM NaCl ( $P < 0.01$ ; Fig. 8A). Based on these results we further tested the effect of St on the  $L_p$  of barley plants in the absence of NaCl. The plants were exposed to either 0, 0.1, 1.0 or 10  $\mu$ M St for 4 h without NaCl prior to the  $L_p$  measurements. An approximately 43.6% reduction in the average  $L_p$  was found in barley roots in response to 0.1  $\mu$ M St ( $P < 0.02$ ; Fig. 8B). Ten-fold increases in the concentration of St led to dramatic reductions in the average  $L_p$  of barley plants, approximately 87.0 and 90.7% reductions at 1.0 and 10.0  $\mu$ M St, respectively, compared with the control condition ( $P < 0.01$  for both St concentrations; Fig. 8B). Note that a quick recovery of  $L_p$  was observed after removal of St (Supplementary Fig. S4), indicating that St did not fatally/non-specifically damage barley roots. These results further demonstrate that the  $L_p$  of barley roots is controlled by phosphorylation.

To see whether the activity of HvPIP2 water channels is influenced by phosphorylation in *Xenopus* oocytes, the effect of K252a and St was investigated. Among the oocytes expressing each *HvPIP2* isoform, there was no significant difference in  $P_f$  between inhibitor-treated and untreated oocytes

(Supplementary Table S1). We further examined the effect of St on the water transport activity of HvPIP2;1 co-expressed with HvPIP1;2 in oocytes, but found no significant change in  $P_f$  (Supplementary Fig. S5).

### HvPIP2 channels mediate water efflux under hypertonic conditions in *X. laevis* oocytes

We investigated whether HvPIP2 isoforms have the potential to mediate water efflux under hypertonic conditions such as in the presence of a large amount of NaCl. *HvPIP2*-expressing *Xenopus* oocytes were exposed to a hypertonic MBS containing an extra 100 mM NaCl, and reductions in volume (shrinking) due to water loss were monitored. Interestingly, the oocytes expressing an *HvPIP2* channel showed more robust reductions in volume than water-injected oocytes in response to the hypertonic stress caused by NaCl (Fig. 9A). Quantitative comparisons of the water efflux activity using  $P_f$  values further revealed that *HvPIP2*-expressing oocytes experienced more extensive water loss than control oocytes (Fig. 9B). These results demonstrated that HvPIP2 channels can mediate the efflux in addition to influx of water depending on the osmotic conditions.

## Discussion

Water homeostasis in plants is crucial not only for growth and development but also for adaptive responses to osmotic stress caused by major abiotic factors such as salinity and drought. Water uptake by roots is an important step in the regulation of water homeostasis. Genetic evidence for the role of PIP aquaporins in the uptake of water by roots has been provided by the knockdown of *PIP* expression in tobacco and Arabidopsis plants using antisense constructs and knockout of the *PIP2;2* gene in Arabidopsis using T-DNA insertions, both of which led to significant reductions in  $L_p$  (Martre et al. 2002, Siefritz et al. 2002, Javot et al. 2003).

Elevated salt concentrations have been shown to inhibit water uptake in roots due to a reduction in  $L_p$  in several plant species including Arabidopsis and maize (Azaizeh and Steudle 1991, Peyrano et al. 1997, Carvajal et al. 1999, Martinez-Ballesta et al. 2000, Martinez-Ballesta et al. 2003, Boursiac et al. 2005). However, a previous physiological study reported that the hydraulic resistance of salinity stress-treated barley plants was relatively constant and similar to that of non-stressed control plants (Munns and Passioura 1984). These studies motivated us to investigate mechanisms of water transport via HvPIP aquaporins and regulation of the water channel activity in barley roots under salinity stress.

Plants first encounter osmotic stress in saline conditions, which leads to a reduction in water uptake or triggers water efflux depending on the extent of the stress. Our findings suggest that HvPIP2 channels predominantly function in water uptake in roots of barley plants (Figs. 4, 6) via an activation process involving phosphorylation (Fig. 8), and that salinity

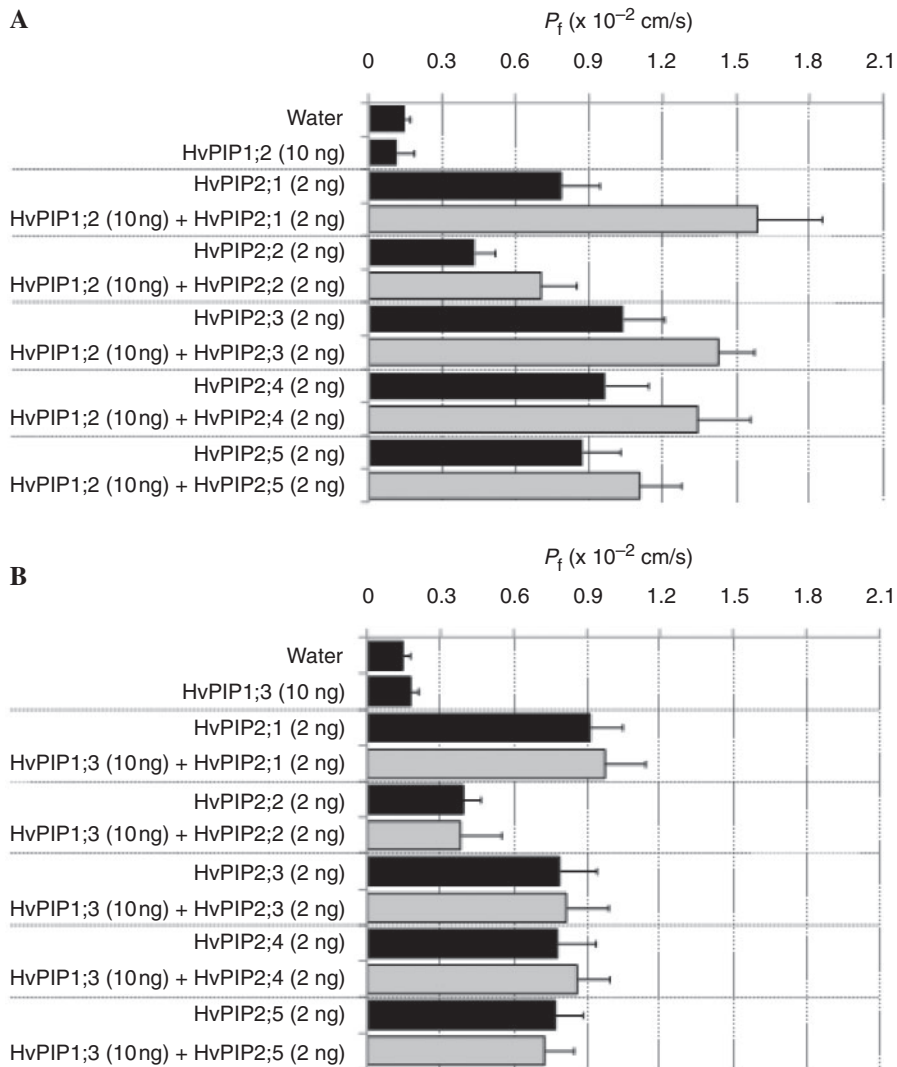

**Fig. 5** Co-expression of each HvPIP2 isoform with HvPIP1;2 but not HvPIP1;3 leads to significant increases in the osmotic water permeability coefficient ( $P_f$ ) of *Xenopus* oocytes. (A) Quantitative comparisons of the  $P_f$  values derived from oocytes injected with water, 10 ng of HvPIP1;2 cRNA, 2 ng of each HvPIP2 cRNA and 10 ng of HvPIP1;2 cRNA together with 2 ng of each HvPIP2 cRNA. Co-expression resulted in significant increases in the  $P_f$  of oocytes ( $P < 0.001$ ) compared with the oocytes expressing each HvPIP2 isoform alone ( $n = 7-6$ ; means  $\pm$  SD). (B) Quantitative comparisons of the  $P_f$  values derived from oocytes injected with water, 10 ng of HvPIP1;3 cRNA, 2 ng of each HvPIP2 cRNA and 10 ng of HvPIP1;3 cRNA together with 2 ng of each HvPIP2 cRNA. In contrast to the results shown in A, HvPIP1;3 did not lead to a significant enhancement of the water transport activity of HvPIP2 ( $n = 10-12$ ; means  $\pm$  SD). Note that HvPIP1;3 showed weak water transport activity when 50 ng of cRNA was injected into oocytes (see Fig. 4).

stress causes reductions in the  $L_{pr}$ , particularly severe stress due to 200 mM NaCl (Figs. 2, 7), similar to what occurs in other plant species. Four-day-old plants treated with either 100 or 200 mM NaCl for 4 h were used to measure  $L_{pr}$  in the present study, whereas more mature plants (20 d old) were subjected to salt stress (25–200 mM) by Munns and Passioura (1984). Therefore, it is hard to make a direct comparison between the two studies. However, the severe repression of  $L_{pr}$  in response to 200 mM NaCl was reproduced in independent experiments. Note that extensive nuclear degradation due to cell death was triggered in barley roots by treatment

with >300 mM NaCl for 24 h, but not by 200 mM NaCl (Katsuhara and Kawasaki 1996). These results indicate that a rigid mechanism controlling the activity of root water channels to adapt to saline conditions exists at least in the seedlings of barley plants as in other plant species. Compared with the studies of a relatively long-term (>1 d) effect of salt stress on barley plants by Munns and Passioura (1984), our studies focused on initial responses (within hours) of barley roots to salt/osmotic stress. Both short- and long-term responses should be important to fully elucidate stress-tolerant mechanisms in plants.

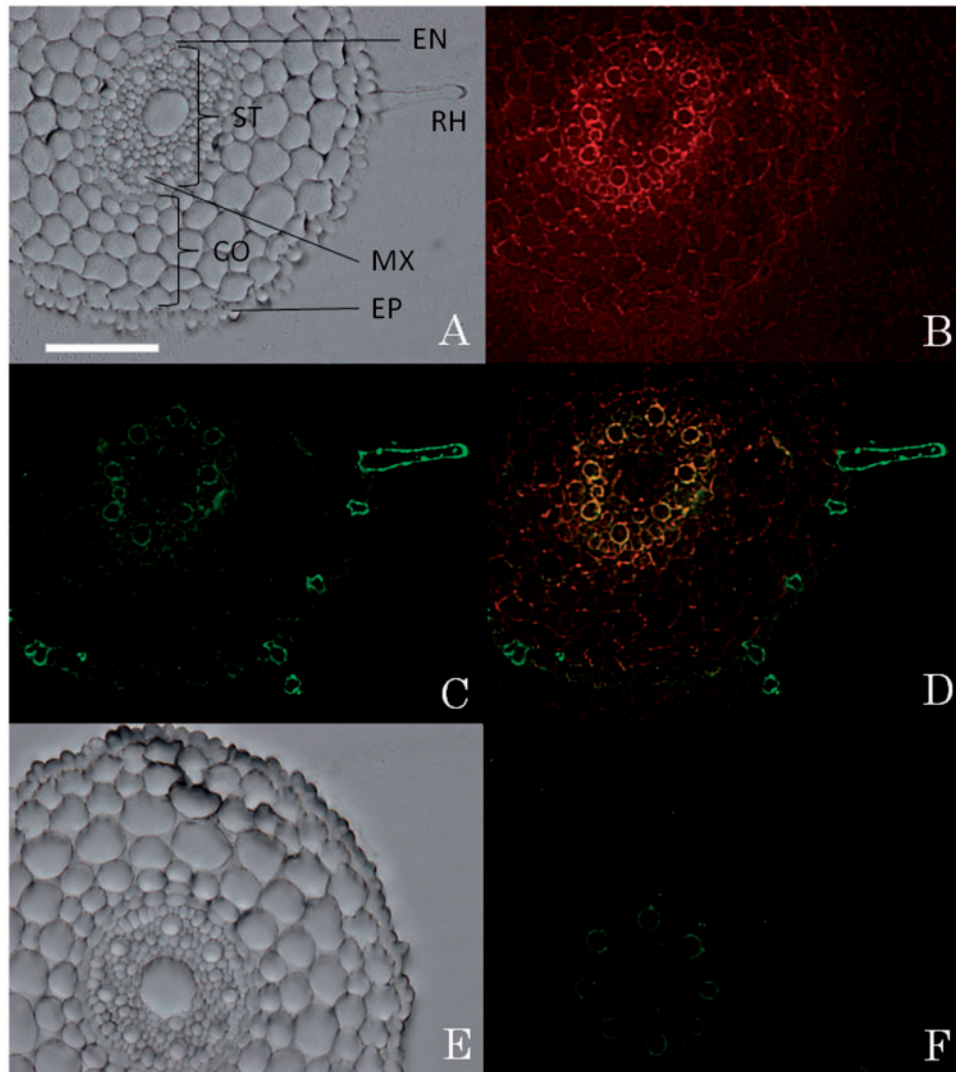

**Fig. 6** In situ localization of HvPIP aquaporins in barley primary roots. A cross-section was prepared approximately 50 mm from the tip of 5-day-old seedlings. The section was hybridized with anti-HvPIP1 rat IgG (antibody) and anti-HvPIP2;2 rabbit IgG (antibody) (A–D). The negative control section was treated with non-immune rat serum plus non-immune rabbit serum (E, F). Sections were then visualized with red fluorescent Alexa 647-conjugated anti-rat IgG goat antibody and green fluorescent Alexa 488-conjugated anti-rabbit IgG goat antibody. (A) A bright field image. EP, epidermis; RH, root hair; CO, cortex; ST, stele; EN, endodermis; MX, metaxylem. The scale bar represents 100  $\mu\text{m}$ . Note that the scale bar is omitted in other panels as all micrographs were recorded at the same magnification. (B) A red fluorescence image of the section in A. (C) A green fluorescence image of the section in A. (D) Overlay of B and C indicating the co-expression of HvPIP1 proteins and the HvPIP2;2 protein in the stele. (E) A bright field image of the control section. (F) Overlay of green and red background fluorescence.

### The molecular mechanism of water transport mediated by HvPIP channels

PIP aquaporins are considered primary water channels functioning at the plasma membrane of plant cells (Martre et al. 2002, Siefritz et al. 2002, Javot et al. 2003). The water uptake activity of PIP aquaporins from different plant species has been investigated using *Xenopus* oocytes and yeast cells (Biela et al. 1999, Katsuhara et al. 2002, Tournaire-Roux et al. 2003, Fetter et al. 2004, Sakurai et al. 2005, Wei et al. 2007, Mahdieh et al. 2008, Matsumoto et al. 2009). PIP2 isoforms were shown to

mediate robust water uptake, in contrast to PIP1 isoforms when the channels were expressed alone in heterologous cells. A similar tendency can be found in the water transport activity of HvPIP proteins. *HvPIP2*-expressing oocytes exhibited substantial water transport activity, a marked contrast to *HvPIP1*-expressing oocytes, in which little water transport activity was observed except in the case of *HvPIP1;3* (Fig. 4). Note, however, that several plant PIP1 proteins were reported to show water transport activity (Biela et al. 1999, Tournaire-Roux et al. 2003, Wei et al. 2007, Mahdieh et al. 2008). In addition to the expression of *HvPIP2;1* in the epidermis in barley

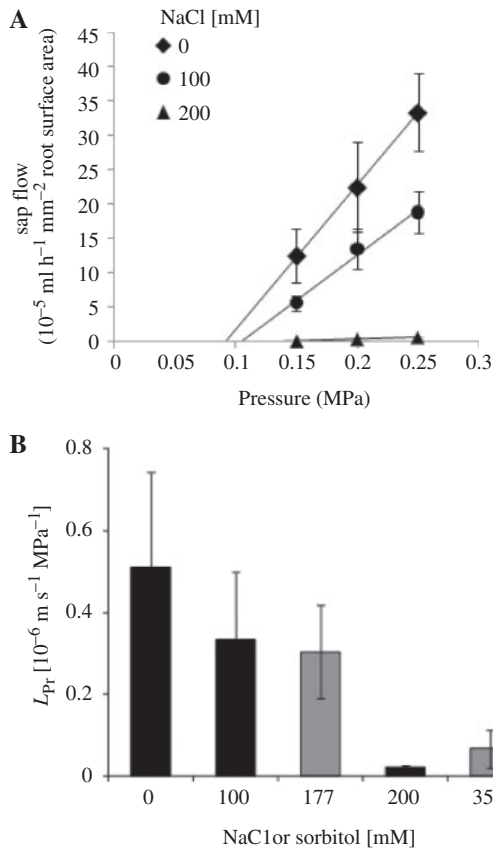

**Fig. 7** The root hydraulic conductance ( $L_{pr}$ ) of barley plants under salinity stress. Permeability to water was measured with a pressure chamber using 4-day-old plants treated with (100 or 200 mM) or without NaCl for 4 h. (A) Average pressure–flow relationships, derived from barley plants in the absence or presence of NaCl ( $n=5-8$ ; means  $\pm$  SE). (B) The  $L_{pr}$  of plants exposed to high concentrations of NaCl or sorbitol.  $L_{pr}$  values were calculated from pressure–flow relationships ( $n=5-8$ ; means  $\pm$  SD). In contrast to the moderate reduction in response to 100 mM NaCl ( $P > 0.05$ ), the 200 mM NaCl treatment led to substantial reductions in  $L_{pr}$  ( $P < 0.001$ ). Equivalent osmotic stress caused by sorbitol led to  $L_{pr}$  reductions almost identical to those from each NaCl treatment. Black and gray bars represent results for barley plants treated with NaCl and sorbitol, respectively.

roots (Katsuhara et al. 2003), HvPIP2;2, with the highest mRNA level among HvPIP2 gene products in barley roots (Fig. 3), was predominantly located in epidermis, especially in root hair, and stelar cells (Fig. 6A, C). Together, these results indicate that HvPIP2 proteins form active water channels, and HvPIP2;2 as well as HvPIP2;1 (Katsuhara et al. 2003) mediates water uptake from the outer environment in roots of barley.

Plant aquaporins have been proposed to form a tetramer (Törnroth-Horsefield et al. 2006). Heteromerization of PIP1 and PIP2 aquaporins was further proposed in maize (Fetter et al. 2004, Zelazny et al. 2007). Co-expression of ZmPIP1;2 with either ZmPIP2;1, ZmPIP2;4, ZmPIP2;5 or even AtPIP2;3 was found to trigger significant increases in the  $P_f$  of the oocytes

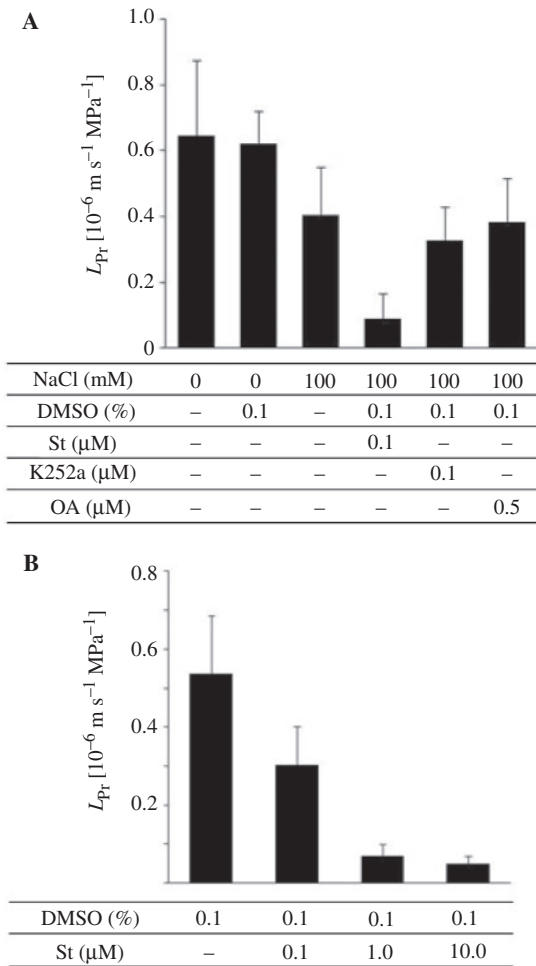

**Fig. 8** Phosphorylation is an essential factor controlling water influx into barley roots. (A) Pharmacological analyses on the  $L_{pr}$  of barley plants treated with 100 mM NaCl for 4 h with or without a kinase inhibitor, K252a (0.1  $\mu$ M) or staurosporine (St; 0.1  $\mu$ M), or a phosphatase inhibitor, okadaic acid (OA; 0.5  $\mu$ M). Only the treatment with St significantly enhanced the NaCl-induced reduction in  $L_{pr}$  ( $P < 0.01$ ;  $n=5-9$ ; means  $\pm$  SD). (B) Dose-dependent reductions in  $L_{pr}$  in response to St. Four-day-old barley plants were treated with either 0, 0.1, 1.0 or 10  $\mu$ M St for 4 h and  $L_{pr}$  was measured by the pressure chamber method. Significant reductions in  $L_{pr}$  were found in the 0.1  $\mu$ M St-treated plants ( $P < 0.02$ ; vs. DMSO-treated plants). Increasing the concentration of St further evoked substantial reductions in  $L_{pr}$  ( $P < 0.01$ ;  $n=5$ ; means  $\pm$  SD).

compared with the expression of each PIP2 alone (Fetter et al. 2004). Co-expression of PIP1s and PIP2s was also investigated in *Mimosa* (Temmei et al. 2005), grapevine (Vandeleur et al. 2009), tobacco (Mahdieh et al. 2008) and beet (Bellati et al. 2010). Co-expression of HvPIP1;2 or HvPIP1;4 with each HvPIP2 isoform significantly increased the  $P_f$  of the oocytes (Fig. 5A for HvPIP1;2 and Supplementary Fig. S1 for HvPIP1;4) despite the fact that neither HvPIP1;2 nor HvPIP1;4 shows water transport activity when expressed alone in oocytes (Fig. 4). HvPIP1 proteins were found to be expressed mostly in



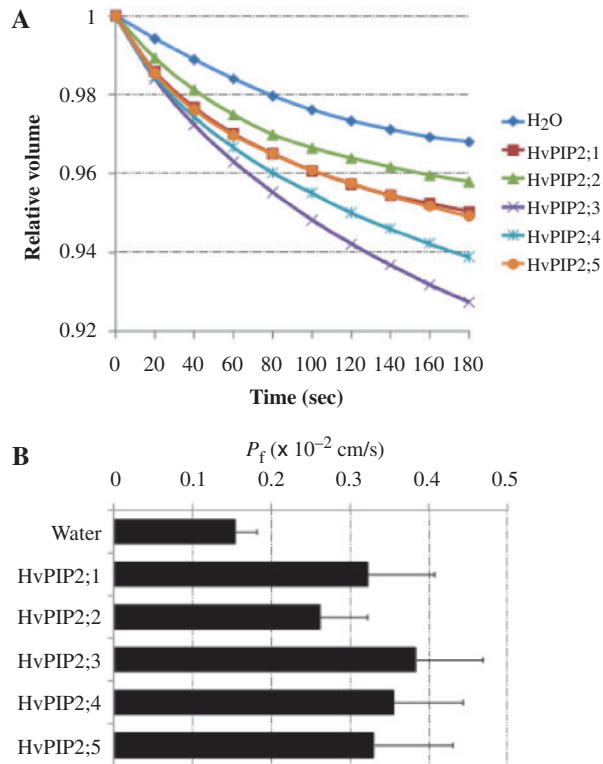

**Fig. 9** HvPIP2 isoforms mediate water efflux under hypertonic conditions in *Xenopus* oocytes. (A) Relative changes in the volume of oocytes injected with either water or 50 ng of each *HvPIP2* cRNA in an MBS containing an extra 100 mM NaCl. Reductions in the volume of each oocyte (thus shrinking) were monitored for 3 min. Results are shown as mean values relative to the original volume at time 0 ( $n = 8-12$ ). (B) Quantitative comparisons of the *HvPIP2*-mediated water efflux activity using a water permeability coefficient ( $P_f$ ) obtained from shrinking assays shown in A. Expression of *HvPIP2* resulted in significant increases in the  $P_f$  ( $P < 0.001$ ), representing water efflux activity, compared with water-injected oocytes ( $n = 8-12$ ; means  $\pm$  SD).

stelar cells, with moderate expression in the cortex cell layer as well (Fig. 6A, B). The expression of *HvPIP1* in stelar cells overlapped that of *HvPIP2;2* well (Fig. 6A, D). Taken together, these results suggested that *HvPIP1* channels can also be employed in the water transport mechanism of barley roots by cooperatively functioning with *HvPIP2* proteins presumably via heteromerization. Recent work also indicated a functional PIP1 in water transport (Postaire et al., 2010).

Note, however, that *HvPIP1;3*, which shows a high degree of similarity to *HvPIP1;2* and *HvPIP1;4* (Fig. 1), was found not to enhance water transport on co-expression with each PIP2 isoform (Fig. 5B). These results indicate that the co-localization of *HvPIP1* and *HvPIP2* in the same cell is not the only factor determining the enhancement of water transport. Elucidating the underlying mechanism including heteromerization of PIP1 and PIP2 isoforms will be important for understanding the water transport mechanism via PIP channels in planta.

## Regulation of water channel activity in barley roots under salinity stress

The  $L_p$  of barley plants was found to be reduced upon osmotic stress established by NaCl or sorbitol (Fig. 7), indicating that the activity of water channels in the roots declined in response to salinity stress particularly due to the osmotic stress phase. The level of *HvPIP* mRNA was relatively stable in the culture with 100 mM NaCl compared with the control (Fig. 3). Interestingly, 0.1  $\mu$ M St greatly reduced the  $L_p$  of barley plants treated with 100 mM NaCl (Fig. 8A). Together with the finding that the  $L_p$  values of non-stressed plants were significantly reduced in response to the external St (Fig. 8B), these results indicate that phosphorylation events control the salinity stress-induced reduction in  $L_p$  through the regulation of water transport activity and that phosphorylation via the St-sensitive kinase(s) is required to activate water transport in barley roots. The mechanism of salinity-induced  $L_p$  reductions has been well characterized in *Arabidopsis* (Boursiac et al. 2005, Boursiac et al. 2008a). It has recently been demonstrated that salicylic acid, like salinity stress, induces the reduction of  $L_p$  in *Arabidopsis* due to its ability to stimulate the accumulation of hydrogen peroxide ( $H_2O_2$ ) (Boursiac et al. 2008a). Salicylic acid- and salinity-induced  $H_2O_2$  accumulation was further found to invoke the internalization of AtPIP aquaporins with surrounding membranes, which in turn reduces the  $L_p$  of *Arabidopsis* plants (Boursiac et al. 2008a, Boursiac et al. 2008b). Whether these mechanisms are key factors and cooperatively function with phosphorylation events in controlling salinity-induced  $L_p$  reductions in barley plants will need to be addressed.

The phosphorylation-mediated reduction in  $L_p$  caused by salinity could be attributed to the direct regulation of *HvPIP* channels in barley roots. The water transport activity of several plant aquaporins has been found to be regulated by direct phosphorylation (Maurel et al. 1995, Johansson et al. 1998, Guenther et al. 2003, Wei et al. 2007, Azad et al. 2008, Van Wilder et al. 2008). We therefore tested whether the water transport activity of *HvPIP2* channels is down-regulated by treatment with phosphorylation inhibitors in *Xenopus* oocytes. However, each inhibitor treatment had no significant influence on the water channel activity of *HvPIP2* in *Xenopus* oocytes (Supplementary Table S1 and Supplementary Fig. S5). It is possible that the water transport activity of *HvPIP* channels in intact roots could be blocked by an unknown regulatory mechanism (e.g. the binding of an unknown/putative regulator protein), which might be turned off upon phosphorylation in barley plants but not in *Xenopus* oocytes. Further investigation will be required to elucidate whether the water transport activity of *HvPIP* channels is regulated by direct phosphorylation in vivo.

## Bidirectional water transport mediated by aquaporins

Bidirectional water transport has been demonstrated to be mediated by animal aquaporins, AQP0, 1, 2, 3, 4 and 5, in

*X. laevis* oocytes (Meinild et al. 1998). To test whether HvPIP aquaporins also regulate bidirectional water transport, we investigated the water efflux activity of HvPIP2 channels using oocytes. Although the difficulty in monitoring the shrinkage of oocytes exposed to hypertonic gradients in comparison with general swelling assays using oocytes had been pointed out (Zhang and Verkman 1991, Meinild et al. 1998), we attempted to examine the shrinkage of HvPIP2-expressing oocytes exposed to a hypertonic MBS including an extra 100 mM NaCl. Interestingly, all five HvPIP2 isoforms expressed in oocytes triggered a more rapid water loss than that in water-injected oocytes (Fig. 9), demonstrating that HvPIP2 channels mediate bidirectional water transport and thus water efflux in hypertonic conditions. Note that the water efflux activity of HvPIP2 channels is much lower than the water influx activity according to the  $P_f$  values. We assume that volume changes (and thus  $P_f$ ) in oocyte-shrinking assays underestimate the actual water efflux activity of HvPIP2 channels because of potential technical limitations. Upon water loss (shrinking) due to hypertonic conditions, changes in the surface area of oocytes tend to be smaller than those in swelling assays presumably because of resistance to shrinkage by cellular components of oocytes. Furthermore, we observed that the shrinkage triggered by hypertonic conditions occurs only in limited areas, which results in small changes even if the partial shrinkage is extensive. In spite of this, however, our attempt enabled us to detect and analyze the water efflux activity of HvPIP2 channels. Note that the  $P_f$  values obtained from shrinking assays showed significant differences compared with those in water-injected control oocytes (Fig. 9B;  $P < 0.001$ ), indicating that the approach used to analyze water efflux activity is semi-quantitative and can provide an index of such activity.

The data presented here indicated that water transport activity is down-regulated in barley roots under salinity stress, as has been demonstrated in many plant species (Azaizeh and Steudle 1991, Peyrano et al. 1997, Carvajal et al. 1999, Martinez-Ballesta et al. 2000, Martinez-Ballesta et al. 2003, Boursiac et al. 2005). Considering the biological significance of such a mechanism, the following possibility can be considered: prevention of excessive water loss from cells during the early stage (the osmotic stress phase) of salinity stress. A CAM plant, *Graptopetalum paraguayense*, has been found to retain far less aquaporin in the plasma membrane and tonoplast than do radish plants (Ohshima et al. 2001). *Graptopetalum* protoplasts were further shown to exhibit significantly lower water permeability than radish protoplasts, which led to a hypothesis that the suppression of aquaporin level/activity might contribute to the higher water storage feature of succulent leaves of *Graptopetalum* plants (Ohshima et al. 2001). The possibility of the down-regulation of plant aquaporins at lowered apoplastic water potentials to prevent water loss has been discussed elsewhere (Kjellbom et al. 1999, del Martínez-Ballesta et al. 2006, Hachez et al. 2006). In addition to the prevention of water loss,  $L_p_r$  reductions might represent the mode of change of barley plants from the rapid growth stage with high water absorption

to the protected/tolerant stage with less water uptake. Such reversible  $L_p_r$  reductions have also been reported in some plants tolerating nutrition (especially phosphate) deprivation (Maurel et al. 2008), indicating that low  $L_p_r$  might be common in the protected/tolerant stage of plants.

More investigations are required to better understand the functions and significance of the regulation of aquaporins in physiological processes under hypertonic stress conditions brought about by major environmental stresses such as salinity and drought in plants.

## Materials and Methods

### Plant materials and growth conditions

The seeds of barley (*H. vulgare*) cv. Haruna-nijyo were sterilized and germinated in the dark as described previously (Katsuhara et al. 2002).

Plants were treated with salinity stress by adding appropriate amounts of NaCl to the hydroponic medium for either: (i) 24 h for the shoot/root elongation analysis; (ii) 1, 2, 4, 8, 12 and 24 h for the HvPIP gene expression analysis; or (iii) 4 h for the measurement of  $L_p_r$ . Note that for inhibitor treatments, 4-day-old plants were transferred from a pot to 15 ml centrifuge tubes filled with the same hydroponic nutrient solution with or without NaCl and incubated in the presence of each inhibitor for 4 h. Dimethylsulfoxide (DMSO) was used as a solvent for all inhibitors.

### Extraction of RNA and quantitative PCR

Root samples were collected after NaCl treatments and immediately frozen in liquid nitrogen. Total RNA was extracted using a mortar and pestle and the RNeasy Plant Mini Kit (Qiagen).

HvPIP expression was analyzed by the quantitative real-time reverse transcription-PCR (RT-PCR) technique using gene-specific primers (Supplementary Table S2), and absolute quantification was performed as described previously (Mahdih et al. 2008).

### HvPIP expression in *Xenopus* oocytes

For the expression of HvPIP2;1 and HvPIP1;3, published DNA constructs were used (Katsuhara et al. 2002, Katsuhara and Shibasaka 2007). All the other HvPIP cDNAs were excised out by appropriate restriction enzymes and both 5' and 3' ends were filled in using the KOD polymerase to make blunt-ended forms (TOYOBO). The resultant fragments were subcloned into the blunt-ended BglIII site of pXβG-ev1. Linearized plasmid constructs were then used for cRNA synthesis with the mMESSEGE mMACHINE T3 in vitro transcription Kit (Ambion).

Oocytes were isolated from adult female *X. laevis* frogs and maintained as described previously (Katsuhara et al. 2002). Oocytes were injected with 50 nl of a cRNA solution containing 2, 10 or 50 ng of each HvPIP cRNA for the expression of HvPIP channels. For the co-expression analysis, 50 nl of a

cRNA solution containing 2 ng of each *HvPIP2* and 10 ng of each *HvPIP1* was injected. As a negative control, water-injected oocytes were used in all experiments. Injected oocytes were incubated in an MBS for approximately 24 h at 18°C. The oocytes were transferred from the MBS (200 mOsm) to either a 2-fold diluted MBS (100 mOsm) for water influx (swelling) assays or an MBS with 100 mM NaCl added (400 mOsm) for water efflux (shrinking) assays. Changes in cell volume were recorded and  $P_f$  values were calculated as described previously (Mahdieh et al. 2008).

In water influx (swelling) assays using kinase inhibitors, injected oocytes were incubated in an MBS supplemented with 1  $\mu$ M K252a (Calbiochem) or 1 or 10  $\mu$ M St (Calbiochem) for 30 min prior to the swelling assays. DMSO was used as a solvent for both inhibitors and the final concentration of DMSO in inhibitor-containing and control DMSO solutions was 0.1%.

### Indirect immunofluorescence microscopy

Root samples (3–5 cm from the root tip) were fixed in a 4% (w/v) formaldehyde solution (pH 7.4) supplemented with 20 mM cacodylic acid sodium salt (Nacalin) and 60 mM sucrose for 4 h at 4°C. Fixed samples were washed three times with the washing solution (20 mM cacodylic acid sodium salt and 60 mM sucrose) at 4°C. Samples were embedded in Technovit 8100 (Kulzer) supplemented with 5% (v/v) butoxyethanol. Micro-sliced samples 20  $\mu$ m thick were surrounded with a thin hydrophobic barrier using PAP PEN (Dido Sangyo) and treated with 0.1% (w/v) pectolyase Y-23 (Kyowa Chemical) in PBS-T [phosphate-buffered saline, 140 mM NaCl, 2.7 mM KCl, 1.5 mM  $\text{KH}_2\text{PO}_4$  and 8.1 mM  $\text{Na}_2\text{HPO}_4$ , supplemented with 0.1% Tween-20 (Nacali)] for 1 h at 25°C in a moisture chamber. After washing with PBS and blocking with 5% skim milk (Becton Dickinson) in PBS-T for 1 h, rat antibody against *HvPIP1s* (generated against the synthetic peptide MEGKEEDVRLGANRY, Medial & Biological Laboratories Co.) and anti-*HvPIP2;2* rabbit antibody (generated against the synthetic peptide VSEPEHAAPAR, Medial & Biological Laboratories Co.) were applied to samples. For a negative control, non-immune rat serum plus non-immune rabbit serum was applied. Primary antibodies or non-immune sera were reacted for 1 h at 25°C, and then secondary antibodies [anti-rat IgG goat antibody conjugated with Alexa 647 and anti-rabbit IgG goat antibody conjugated with Alexa 488 (Invitrogen)] for another 1 h. After washing twice with the blocking solution and once with PBS, samples were analyzed with a fluorescence microscope (BZ-8000, Keyence). For the quantitative fluorescence analysis, images were converted into monochrome images. Fluorescence intensity was measured with the lines indicated in images using WinRoof software (ver. 3.51, MITANI Corporation, 2000).

### Measurements of $L_p$

The stem was fixed on a metal plant holder and the gap between the holder and sample was filled with dental paste (PROVIL<sup>®</sup> novo Light; Heraeus Kulzer). The fixed sample was

set in a pressure chamber filled with either the nutrient solution or the solution supplemented with NaCl. Pressure ( $P$ ) was applied to the chamber using an air compressor (Super Oil Free Bebicom; Hitachi, Ltd.) and exuded sap was collected into a glass tube at each pressure point. The sap flow rate of individual samples ( $J$ ) was determined by measuring sap weight per unit time. The surface area of the root of individual samples ( $A$ ) was measured using the WinRHIZO system (Regent Instruments Inc.).  $J/A$  was plotted against  $P$ , and the regression line was determined between  $P = 0.15$  MPa and  $P = 0.25$  MPa.  $L_{p,r}$  was calculated as the slope of the regression line.

### Supplementary data

Supplementary data are available at PCP online.

### Funding

This work was supported by the Program for Promotion of Basic Research Activities for Innovative Biosciences [grant to M.K.].

### Acknowledgments

We thank Professor Hirasawa (Agriculture and Technology, Tokyo University) for his valuable suggestions about establishing the pressure chamber. We also thank Ms. Itani (Institute of Plant Science and Resources, Okayama University) for technical assistance.

### References

- Azad, A.K., Katsuhara, M., Sawa, Y., Ishikawa, T. and Shibata, H. (2008) Characterization of four plasma membrane aquaporins in tulip petals: a putative homolog is regulated by phosphorylation. *Plant Cell Physiol.* 49: 1196–1208.
- Azaizeh, H. and Steudle, E. (1991) Effects of salinity on water transport of excised maize (*Zea mays* L.) roots. *Plant Physiol.* 97: 1136–1145.
- Bellati, J., Alleva, K., Soto, G., Vitali, V., Jozefkiewicz, C. and Amodeo, G. (2010) Intracellular pH sensing is altered by plasma membrane PIP aquaporin co-expression. *Plant Mol. Biol.* 74: 105–118.
- Biela, A., Grote, K., Otto, B., Hoth, S., Hedrich, R. and Kaldenhoff, R. (1999) The *Nicotiana tabacum* plasma membrane aquaporin NtAQP1 is mercury-insensitive and permeable for glycerol. *Plant J.* 18: 565–570.
- Bienert, G.P., Moller, A.L., Kristiansen, K.A., Schulz, A., Moller, I.M., Schjoerring, J.K. et al. (2007) Specific aquaporins facilitate the diffusion of hydrogen peroxide across membranes. *J. Biol. Chem.* 282: 1183–1192.
- Boursiac, Y., Boudet, J., Postaire, O., Luu, D.T., Tournaire-Roux, C. and Maurel, C. (2008a) Stimulus-induced downregulation of root water transport involves reactive oxygen species-activated cell signalling and plasma membrane intrinsic protein internalization. *Plant J.* 56: 207–218.

- Boursiac, Y., Chen, S., Luu, D.T., Sorieul, M., van den Dries, N. and Maurel, C. (2005) Early effects of salinity on water transport in Arabidopsis roots. Molecular and cellular features of aquaporin expression. *Plant Physiol.* 139: 790–805.
- Boursiac, Y., Prak, S., Boudet, J., Postaire, O., Luu, D.-T., Tournaire-Roux, C. et al. (2008b) The response of Arabidopsis root water transport to a challenging environment implicates reactive oxygen species- and phosphorylation-dependent internalization of aquaporins. *Plant Signal. Behav.* 3: 1096–1098.
- Carvajal, M., Martinez, V. and Alcaraz, C.F. (1999) Physiological function of water channels as affected by salinity in roots of paprika pepper. *Physiol. Plant.* 105: 95–101.
- Chaumont, F., Barrieu, F., Jung, R. and Chrispeels, M.J. (2000) Plasma membrane intrinsic proteins from maize cluster in two sequence subgroups with differential aquaporin activity. *Plant Physiol.* 122: 1025–1034.
- Chaumont, F., Moshelion, M. and Daniels, M.J. (2005) Regulation of plant aquaporin activity. *Biol. Cell* 97: 749–764.
- Danielson, J.A. and Johanson, U. (2008) Unexpected complexity of the aquaporin gene family in the moss *Physcomitrella patens*. *BMC Plant Biol.* 8: 45.
- del Martínez-Ballesta, M.C., Silva, C., Lopez-Berenguer, C., Cabanero, F.J. and Carvajal, M. (2006) Plant aquaporins: new perspectives on water and nutrient uptake in saline environment. *Plant Biol. (Stuttg.)* 8: 535–546.
- Dereeper, A., Guignon, V., Blanc, G., Audic, S., Buffet, S., Chevenet, F. et al. (2008) Phylogeny.fr: robust phylogenetic analysis for the non-specialist. *Nucleic Acids Res.* 36: W465–W469.
- Dordas, C., Chrispeels, M.J. and Brown, P.H. (2000) Permeability and channel-mediated transport of boric acid across membrane vesicles isolated from squash roots. *Plant Physiol.* 124: 1349–1362.
- Dynowski, M., Schaaf, G., Loque, D., Moran, O. and Ludewig, U. (2008) Plant plasma membrane water channels conduct the signalling molecule H<sub>2</sub>O<sub>2</sub>. *Biochem. J.* 414: 53–61.
- Fetter, K., Van Wilder, V., Moshelion, M. and Chaumont, F. (2004) Interactions between plasma membrane aquaporins modulate their water channel activity. *Plant Cell* 16: 215–228.
- Forrest, K.L. and Bhave, M. (2007) Major intrinsic proteins (MIPs) in plants: a complex gene family with major impacts on plant phenotype. *Funct. Integr. Genomics* 7: 263–289.
- Gaspar, M., Bousser, A., Sissoeff, I., Roche, O., Hoarau, J. and Mahe, A. (2003) Cloning and characterization of ZmPIP1-5b, an aquaporin transporting water and urea. *Plant Sci.* 165: 21–31.
- Guenther, J.F., Chanmanivone, N., Galetovic, M.P., Wallace, I.S., Cobb, J.A. and Roberts, D.M. (2003) Phosphorylation of soybean nodulin 26 on serine 262 enhances water permeability and is regulated developmentally and by osmotic signals. *Plant Cell* 15: 981–991.
- Hachez, C., Zelazny, E. and Chaumont, F. (2006) Modulating the expression of aquaporin genes in planta: a key to understand their physiological functions? *Biochim. Biophys. Acta* 1758: 1142–1156.
- Hanba, Y.T., Shibusaka, M., Hayashi, Y., Hayakawa, T., Kasamo, K., Terashima, I. et al. (2004) Overexpression of the barley aquaporin HvPIP2;1 increases internal CO<sub>2</sub> conductance and CO<sub>2</sub> assimilation in the leaves of transgenic rice plants. *Plant Cell Physiol.* 45: 521–529.
- Hauser, F. and Horie, T. (2010) A conserved primary salt tolerance mechanism mediated by HKT transporters: a mechanism for sodium exclusion and maintenance of high K/Na ratio in leaves during salinity stress. *Plant Cell Environ.* 33: 552–565.
- Hollenbach, B. and Dietz, K. (1995) Molecular cloning of *emip*, a member of the major intrinsic protein (MIP) gene family, preferentially expressed in epidermal cells of barley leaves. *Bot. Acta* 108: 425–431.
- Horie, T., Hauser, F. and Schroeder, J.I. (2009) HKT transporter-mediated salinity resistance mechanisms in *Arabidopsis* and monocot crop plants. *Trends Plant Sci.* 14: 660–668.
- Javot, H., Lauvergeat, V., Santoni, V., Martin-Laurent, F., Guclu, J., Vinh, J. et al. (2003) Role of a single aquaporin isoform in root water uptake. *Plant Cell* 15: 509–522.
- Javot, H. and Maurel, C. (2002) The role of aquaporins in root water uptake. *Ann. Bot.* 90: 301–313.
- Johansson, I., Karlsson, M., Shukla, V.K., Chrispeels, M.J., Larsson, C. and Kjellbom, P. (1998) Water transport activity of the plasma membrane aquaporin PM28A is regulated by phosphorylation. *Plant Cell* 10: 451–459.
- Katsuhara, M., Akiyama, Y., Koshio, K., Shibusaka, M. and Kasamo, K. (2002) Functional analysis of water channels in barley roots. *Plant Cell Physiol.* 43: 885–893.
- Katsuhara, M. and Hanba, Y.T. (2008) Barley plasma membrane intrinsic proteins (PIP aquaporins) as water and CO<sub>2</sub> transporters. *Pflügers Arch.* 456: 687–691.
- Katsuhara, M., Hanba, Y.T., Shiratake, K. and Maeshima, M. (2008) Expanding roles of plant aquaporins in plasma membranes and cell organelles. *Funct. Plant Biol.* 35: 1–14.
- Katsuhara, M. and Kawasaki, T. (1996) Salt stress induced nuclear and DNA degradation in meristematic cells of barley roots. *Plant Cell Physiol.* 37: 169–173.
- Katsuhara, M., Koshio, K., Shibusaka, M. and Kasamo, K. (2003) Expression of an aquaporin at night in relation to the growth and root water permeability in barley seedlings. *Soil Sci. Plant Nutr.* 49: 883–888.
- Katsuhara, M. and Shibusaka, M. (2007) Barley root hydraulic conductivity and aquaporins expression in relation to salt tolerance. *Soil Sci. Plant Nutr.* 53: 466–470.
- Kjellbom, P., Larsson, C., Johansson, I.I., Karlsson, M. and Johanson, U. (1999) Aquaporins and water homeostasis in plants. *Trends Plant Sci.* 4: 308–314.
- Ma, J.F., Tamai, K., Yamaji, N., Mitani, N., Konishi, S., Katsuhara, M. et al. (2006) A silicon transporter in rice. *Nature* 440: 688–691.
- Ma, J.F., Yamaji, N., Mitani, N., Xu, X.Y., Su, Y.H., McGrath, S.P. et al. (2008) Transporters of arsenite in rice and their role in arsenic accumulation in rice grain. *Proc. Natl Acad. Sci. USA* 105: 9931–9935.
- Mahdieh, M., Mostajeran, A., Horie, T. and Katsuhara, M. (2008) Drought stress alters water relations and expression of PIP-type aquaporin genes in *Nicotiana tabacum* plants. *Plant Cell Physiol.* 49: 801–813.
- Martinez-Ballesta, M.C., Aparicio, F., Pallas, V., Martinez, V. and Carvajal, M. (2003) Influence of saline stress on root hydraulic conductance and PIP expression in *Arabidopsis*. *J. Plant Physiol.* 160: 689–697.
- Martinez-Ballesta, M.C., Martinez, V. and Carvajal, M. (2000) Regulation of water channel activity in whole roots and in protoplasts from roots of melon plants grown under saline conditions. *Aust. J. Plant Physiol.* 27: 685–691.
- Martre, P., Morillon, R., Barrieu, F., North, G.B., Nobel, P.S. and Chrispeels, M.J. (2002) Plasma membrane aquaporins play a significant role during recovery from water deficit. *Plant Physiol.* 130: 2101–2110.

- Matsumoto, T., Lian, H.L., Su, W.A., Tanaka, D., Liu, C., Iwasaki, I. et al. (2009) Role of the aquaporin PIP1 subfamily in the chilling tolerance of rice. *Plant Cell Physiol.* 50: 216–229.
- Maurel, C., Kado, R.T., Guern, J. and Chrispeels, M.J. (1995) Phosphorylation regulates the water channel activity of the seed-specific aquaporin alpha-TIP. *EMBO J.* 14: 3028–3035.
- Maurel, C., Verdoucq, L., Luu, D.T. and Santoni, V. (2008) Plant aquaporins: membrane channels with multiple integrated functions. *Annu. Rev. Plant Biol.* 59: 595–624.
- Meinild, A.K., Klaerke, D.A. and Zeuthen, T. (1998) Bidirectional water fluxes and specificity for small hydrophilic molecules in aquaporins 0–5. *J. Biol. Chem.* 273: 32446–32451.
- Munns, R. and Passioura, J.B. (1984) Hydraulic resistance of plants. III. Effects of NaCl in barley and lupin. *Aust. J. Plant Physiol.* 11: 351–359.
- Munns, R. and Tester, M. (2008) Mechanisms of salinity tolerance. *Annu. Rev. Plant Biol.* 59: 651–681.
- Ohshima, Y., Iwasaki, I., Suga, S., Murakami, M., Inoue, K. and Maeshima, M. (2001) Low aquaporin content and low osmotic water permeability of the plasma and vacuolar membranes of a CAM plant *Graptopetalum paraguayense*: comparison with radish. *Plant Cell Physiol.* 42: 1119–1129.
- Peyrano, G., Taleisnik, E., Quiroga, M., de Forchetti, S.M. and Tigier, H. (1997) Salinity effects on hydraulic conductance, lignin content and peroxidase activity in tomato roots. *Plant Physiol Biochem.* 35: 387–393.
- Postaire, O., Tournaire-Roux, C., Grondin, A., Boursiac, Y., Morillon, R., Schäffner, A.R. et al. (2010) A PIP1 aquaporin contributes to hydrostatic pressure-induced water transport in both the root and rosette of *Arabidopsis*. *Plant Physiol.* 152: 1418–1430.
- Sade, N., Vinocur, B.J., Diber, A., Shatil, A., Ronen, G., Nissan, H. et al. (2009) Improving plant stress tolerance and yield production: is the tonoplast aquaporin SITIP2;2 a key to isohydric to anisohydric conversion? *New Phytol.* 181: 651–661.
- Sakurai, J., Ishikawa, F., Yamaguchi, T., Uemura, M. and Maeshima, M. (2005) Identification of 33 rice aquaporin genes and analysis of their expression and function. *Plant Cell Physiol.* 46: 1568–1577.
- Siefritz, F., Tyree, M.T., Lovisolo, C., Schubert, A. and Kaldenhoff, R. (2002) PIP1 plasma membrane aquaporins in tobacco: from cellular effects to function in plants. *Plant Cell* 14: 69–876.
- Temmei, Y., Uchida, S., Hoshino, D., Kanzaw, N., Kuwahara, M., Sasaki, S. et al. (2005) Water channel activities of *Mimosa pudica* plasma membrane intrinsic proteins are regulated by direct interaction and phosphorylation. *FEBS Lett.* 579: 4417–4422.
- Takano, J., Wada, M., Ludewig, U., Schaaf, G., von Wiren, N. and Fujiwara, T. (2006) The *Arabidopsis* major intrinsic protein NIP5;1 is essential for efficient boron uptake and plant development under boron limitation. *Plant Cell* 18: 1498–1509.
- Törnroth-Horsefield, S., Wang, Y., Hedfalk, K., Johanson, U., Karlsson, M., Tajkhorshid, E. et al. (2006) Structural mechanism of plant aquaporin gating. *Nature* 439: 688–694.
- Tournaire-Roux, C., Sutka, M., Javot, H., Gout, E., Gerbeau, P., Luu, D.T. et al. (2003) Cytosolic pH regulates root water transport during anoxic stress through gating of aquaporins. *Nature* 425: 393–397.
- Tyerman, S.D., Niemietz, C.M. and Bramley, H. (2002) Plant aquaporins: multifunctional water and solute channels with expanding roles. *Plant Cell Environ.* 25: 173–194.
- Uehlein, N., Lovisolo, C., Siefritz, F. and Kaldenhoff, R. (2003) The tobacco aquaporin NtAQP1 is a membrane CO<sub>2</sub> pore with physiological functions. *Nature* 425: 734–737.
- Van Wilder, V., Micielica, U., Degand, H., Derua, R., Waelkens, E. and Chaumont, F. (2008) Maize plasma membrane aquaporins belonging to the PIP1 and PIP2 subgroups are in vivo phosphorylated. *Plant Cell Physiol.* 49: 1364–1377.
- Vandeleur, R.K., Mayo, G., Shelden, M.C., Gilliam, M., Kaiser, B.N. and Tyerman, S.D. (2009) The role of plasma membrane intrinsic protein aquaporins in water transport through roots: diurnal and drought stress responses reveal different strategies between isohydric and anisohydric cultivars of grapevine. *Plant Physiol.* 149: 445–460.
- Wei, W., Alexandersson, E., Golldack, D., Miller, A.J., Kjellbom, P.O. and Fricke, W. (2007) HvPIP1;6, a barley (*Hordeum vulgare* L.) plasma membrane water channel particularly expressed in growing compared with non-growing leaf tissues. *Plant Cell Physiol.* 48: 1132–1147.
- Zelazny, E., Borst, J.W., Muylaert, M., Batoko, H., Hemminga, M.A. and Chaumont, F. (2007) FRET imaging in living maize cells reveals that plasma membrane aquaporins interact to regulate their subcellular localization. *Proc. Natl Acad. Sci. USA* 104: 12359–12364.
- Zhang, R.B. and Verkman, A.S. (1991) Water and urea permeability properties of *Xenopus* oocytes: expression of mRNA from toad urinary bladder. *Amer. J. Physiol.* 260: C26–C34.
